# Supplementary material for: Rotational order–disorder and spin crossover behaviour in a neutral iron(ii) complex based on asymmetrically substituted large planar ionogenic ligand
Source: Royal Society of Chemistry journal article supplement (doi:10.1039/d4dt00368c), 2024-01-01
Supplement: d4dt00368c1.pdf [file d4dt00368c1.pdf]

## Supporting Information

### Rotational order-disorder and spin crossover behaviour in a neutral iron(II) complex based on asymmetrically substituted large planar ionogenic ligand

Maksym Seredyuk<sup>\*abc</sup>, Kateryna Znovyak<sup>a</sup>, Francisco Javier Valverde-Muñoz<sup>b</sup>, M. Carmen Muñoz<sup>d</sup>, Igor O. Fritsky,<sup>a</sup> José Antonio Real<sup>b\*</sup>

<sup>a</sup> Department of Chemistry, Taras Shevchenko National University of Kyiv, 64/13, Volodymyrska Street, 01601 Kyiv, Ukraine; E-mail: maksym.seredyuk@knu.ua

<sup>b</sup> Instituto de Ciencia Molecular, Departamento de Química Inorgánica, Universidad de Valencia, 46980 Paterna, Valencia, Spain; E-mail: jose.a.real@uv.es

<sup>c</sup> Enamine Ltd., Winston Churchill Str. 78, 02094 Kyiv, Ukraine

<sup>d</sup> Departamento de Física Aplicada, Universitat Politècnica de València, Camino de Vera s/n, E-46022, Valencia, Spain

|                                                                                                                                                                                                                                                                                                                                                                                             |          |
|---------------------------------------------------------------------------------------------------------------------------------------------------------------------------------------------------------------------------------------------------------------------------------------------------------------------------------------------------------------------------------------------|----------|
| <b>Table S1.</b> Crystal data of <b>2F</b> .....                                                                                                                                                                                                                                                                                                                                            | <b>2</b> |
| <b>Table S2.</b> Comparison of the cell parameters of <b>2F</b> <sup>293K</sup> and <b>2F</b> <sup>des</sup> .....                                                                                                                                                                                                                                                                          | <b>2</b> |
| <b>Table S3.</b> The full colour-coded interaction mappings of a central reference molecule with nearest neighbors of <b>2F</b> and the contributions to the total energy in both spin states as calculated by DTF- B3LYP/6-31G(d,p) method.....                                                                                                                                            | <b>3</b> |
| <b>Table S4.</b> Full colour-coded interaction mappings of a methanol molecule with nearest neighbour molecules of <b>2F</b> and the contributions to the total energy in both spin states and F-atom orientations calculated by DTF-B3LYP/6-31G(d,p) method.....                                                                                                                           | <b>4</b> |
| <b>Table S5.</b> The full colour-coded interaction mappings of a central reference molecule with nearest neighbors of <b>2F</b> and the contributions to the total energy in both spin states as calculated by DTF-B3LYP/6-31G(d,p) method. For the HS state phase calculation are for the fluorine atom oriented in the same way as in the LS state (toward the Fe <sup>II</sup> ion)..... | <b>5</b> |
| <b>Figure S1.</b> Comparison of calculated X-ray powder diffraction profile of <b>2F</b> at 293 K with the experimental one of <b>2F</b> <sup>des</sup> recorded at room temperature.....                                                                                                                                                                                                   | <b>6</b> |
| <b>References</b> .....                                                                                                                                                                                                                                                                                                                                                                     | <b>6</b> |

**Table S1.** Crystal data of **2F**.

| Temperature/K                                                | <b>220(2)</b>                                                                      | <b>293(2)</b>                                                                      |
|--------------------------------------------------------------|------------------------------------------------------------------------------------|------------------------------------------------------------------------------------|
| Empirical formula                                            | C <sub>34</sub> H <sub>28</sub> F <sub>2</sub> FeN <sub>12</sub> O <sub>2</sub>    |                                                                                    |
| Formula weight                                               | 730.53                                                                             |                                                                                    |
| Crystal system                                               | orthorhombic                                                                       |                                                                                    |
| Space group                                                  | <i>Pbcn</i>                                                                        |                                                                                    |
| Crystal size/mm <sup>3</sup>                                 | 0.09 × 0.08 × 0.04                                                                 |                                                                                    |
| <i>a</i> /Å                                                  | 12.7752(8)                                                                         | 13.05(2)                                                                           |
| <i>b</i> /Å                                                  | 10.7048(7)                                                                         | 10.401(18)                                                                         |
| <i>c</i> /Å                                                  | 24.3576(16)                                                                        | 25.06(4)                                                                           |
| <i>V</i> /Å <sup>3</sup>                                     | 3331.0(4)                                                                          | 3402(10)                                                                           |
| <i>Z</i>                                                     | 4                                                                                  | 4                                                                                  |
| $\rho_{\text{calc}}$ g/cm <sup>3</sup>                       | 1.457                                                                              | 1.426                                                                              |
| $\mu$ /mm <sup>-1</sup>                                      | 0.517                                                                              | 0.506                                                                              |
| <i>F</i> (000)                                               | 1504.0                                                                             | 1504.0                                                                             |
| 2 $\theta$ range for data collection/°                       | 4.62 to 50.1                                                                       | 5.008 to 50.024                                                                    |
| Index ranges                                                 | -15 ≤ <i>h</i> ≤ 15<br>-12 ≤ <i>k</i> ≤ 12<br>-26 ≤ <i>l</i> ≤ 29                  | -15 ≤ <i>h</i> ≤ 15<br>-12 ≤ <i>k</i> ≤ 12<br>-29 ≤ <i>l</i> ≤ 29                  |
| Reflections collected                                        | 22138                                                                              | 23664                                                                              |
| Independent reflections                                      | 2946<br>[ <i>R</i> <sub>int</sub> = 0.1270,<br><i>R</i> <sub>sigma</sub> = 0.0637] | 3001<br>[ <i>R</i> <sub>int</sub> = 0.2049,<br><i>R</i> <sub>sigma</sub> = 0.0917] |
| Data/restraints/parameters                                   | 2946/0/233                                                                         | 3001/0/243                                                                         |
| Goodness-of-fit on <i>F</i> <sup>2</sup>                     | 1.105                                                                              | 1.085                                                                              |
| Final <i>R</i> indexes [ <i>I</i> ≥ 2 $\sigma$ ( <i>I</i> )] | <i>R</i> <sub>1</sub> = 0.0703,<br><i>wR</i> <sub>2</sub> = 0.1626                 | <i>R</i> <sub>1</sub> = 0.0624,<br><i>wR</i> <sub>2</sub> = 0.1477                 |
| Final <i>R</i> indexes [all data]                            | <i>R</i> <sub>1</sub> = 0.1149,<br><i>wR</i> <sub>2</sub> = 0.1929                 | <i>R</i> <sub>1</sub> = 0.1520,<br><i>wR</i> <sub>2</sub> = 0.2283                 |
| Largest diff. peak/hole / e Å <sup>-3</sup>                  | 0.91/-0.56                                                                         | 0.59/-0.39                                                                         |

**Table S2.** Comparison of the cell parameters of indicated phases.

|                            | <i>a</i> , Å | <i>b</i> , Å | <i>c</i> , Å |
|----------------------------|--------------|--------------|--------------|
| <b>2F</b> <sup>293K</sup>  | 13.05(2)     | 10.40(2)     | 25.06(4)     |
| <b>2F</b> <sup>des *</sup> | 13.40        | 8.63         | 26.73        |

\*Evaluated by Expo2014 software<sup>1</sup>.

**Table S3.** Full colour-coded interaction mappings of a central reference molecule with nearest neighbors of **2F** and the contributions to the total energy in both spin states as calculated by DTF-B3LYP/6-31G(d,p) method.

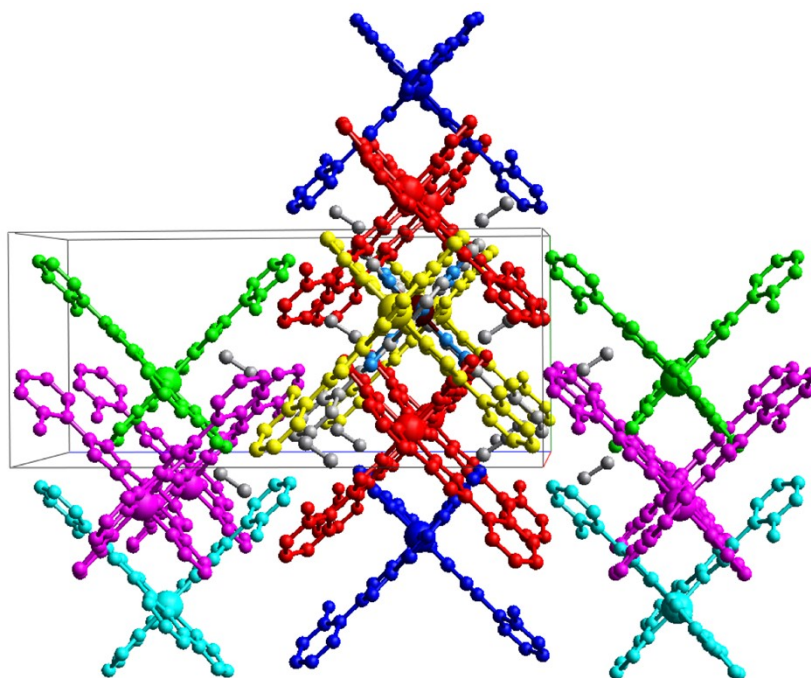

|  | Symmetry operation     | R, Å      | F-atom orientation  | Energy, kJ mol <sup>-1</sup>   |                                |                                |                      |                           |                                 |
|--|------------------------|-----------|---------------------|--------------------------------|--------------------------------|--------------------------------|----------------------|---------------------------|---------------------------------|
|  |                        |           |                     | Electrostatic                  | Polarization                   | Dispersion                     | Exchange-repulsion   | E(Total)                  | $\Delta E$ ("away" – "towards") |
|  | $x+1/2, y+1/2, -z+1/2$ | 8.34      | "towards"<br>"away" | -<br>34.<br>7<br>-<br>35.<br>7 | -<br>18.<br>0<br>-<br>18.<br>7 | -<br>80.<br>1<br>-<br>84.<br>7 | 56.<br>6<br>62.<br>8 | 84.<br>8<br>-<br>86.<br>5 | -1.7                            |
|  | x, y, z                | 13.0<br>5 | "towards"<br>"away" | 7.1<br>7.4                     | -1.9<br>-1.9                   | -<br>10.<br>6<br>-<br>10.<br>6 | 7.6<br>7.6           | 1.6<br>1.8                | 0.2                             |
|  | x, y, z                | 10.4<br>0 | "towards"<br>"away" | -<br>22.                       | -5.2<br>-5.6                   | -<br>29.                       | 20.<br>7             | -<br>40.                  | -1.3                            |

|  |            |           |                     |                    |              |                           |            |                                |      |
|--|------------|-----------|---------------------|--------------------|--------------|---------------------------|------------|--------------------------------|------|
|  |            |           |                     | 5<br>-<br>24.<br>2 |              | 1<br>-<br>28.<br>6        | 21.<br>5   | 1<br>-<br>41.<br>4             |      |
|  | -x, -y, -z | 12.5<br>4 | "towards"<br>"away" | -2.1<br>-5.0       | -2.5<br>-2.4 | 19.<br>4<br>-<br>19.<br>0 | 7.6<br>7.7 | -<br>16.<br>3<br>-<br>18.<br>8 | -2.5 |
|  | -x, -y, -z | 16.5<br>5 | "towards"<br>"away" | -0.1<br>0.6        | -0.6<br>-0.7 | -7.9<br>-7.6              | 3.0<br>3.1 | -5.6<br>-4.6                   | -1.0 |

**Table S4.** Full colour-coded interaction mappings of a methanol molecule with nearest neighbour molecules of **2F** and the contributions to the total energy in both spin states and F-atom orientations calculated by DTF-B3LYP/6-31G(d,p) method. Cut-off is 5.0 kJ mol<sup>-1</sup>.

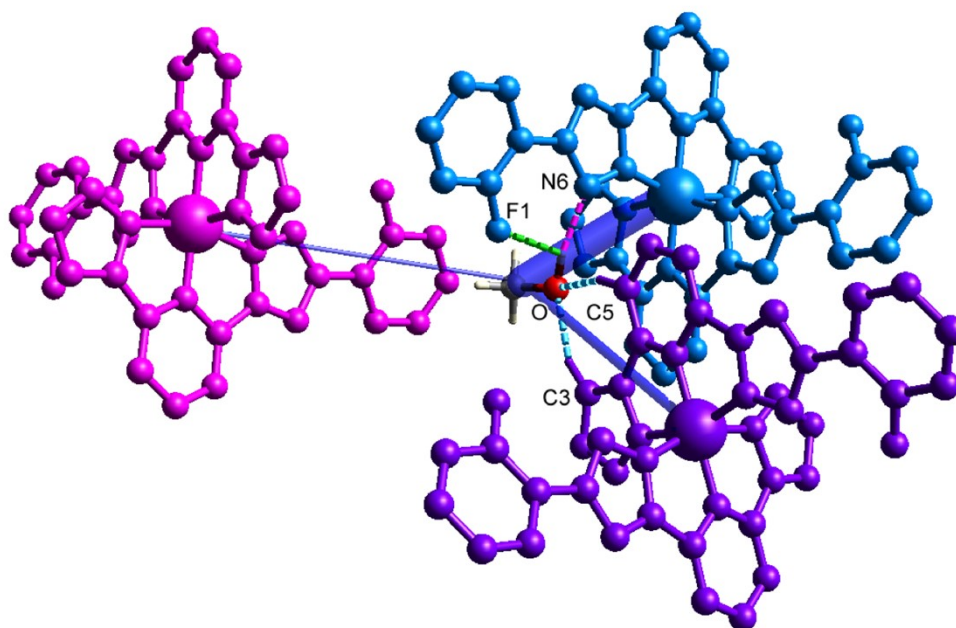

| Colour code | Symmetry operation of the contact complex molecule | Spin state, F-atom orientation | R, Å | Energy, kJ mol <sup>-1</sup> |              |            |                    |          |                                 |
|-------------|----------------------------------------------------|--------------------------------|------|------------------------------|--------------|------------|--------------------|----------|---------------------------------|
|             |                                                    |                                |      | Electrostatic                | Polarization | Dispersion | Exchange-repulsion | E(Total) | $\Delta E$ ("away" – "towards") |
| Blue        | same                                               | 220K, LS                       | 4.3  | -                            | -            | -          | 72.3               | -60.0    | 5.2                             |
|             |                                                    | 293K, HS, "away"               | 8    | 59.                          | 19.          | 31.        |                    |          |                                 |
|             |                                                    | 293K, HS, "towards"            | 8    | 8                            | 0            | 4          | 59.8               | -53.0    |                                 |
|             |                                                    | 293K, HS, "towards"            | 4.3  | 4.3                          | -            | -          | 63.0               | -58.2    |                                 |
|             |                                                    | 293K, HS, "towards"            | 0    | 0                            | -            | -          |                    |          |                                 |
|             |                                                    | 293K, HS, "towards"            | 4.3  | 50.                          | 16.          | 27.        |                    |          |                                 |
| Purple      | $x+1/2, y+1/2, -z+1/2$                             | 220K, LS                       | 8.0  | -                            | -5.7         | -9.9       | 26.3               | -18.8    | 0.0                             |
|             |                                                    | 293K, HS, "away"               | 8    | 21.                          |              |            |                    |          |                                 |
|             |                                                    | 293K, HS, "away"               | 1    | -5.3                         | -9.7         | 23.2       | -18.7              |          |                                 |
|             |                                                    | 293K, HS, "away"               | 8.3  | -5.3                         | -9.7         | 23.2       | -18.7              |          |                                 |
|             |                                                    | 293K, HS, "away"               | 5    | -                            |              |            |                    |          |                                 |
|             |                                                    | 293K, HS, "away"               | 5    | -                            |              |            |                    |          |                                 |

|  |            |                                                           |                                  |                           |                      |                               |                   |                      |     |
|--|------------|-----------------------------------------------------------|----------------------------------|---------------------------|----------------------|-------------------------------|-------------------|----------------------|-----|
|  |            | "towards"                                                 | 8.3<br>1                         | 19.<br>6<br>-<br>19.<br>6 |                      |                               |                   |                      |     |
|  | -x, -y, -z | 220K, LS<br>293K, HS,<br>"away"<br>293K, HS,<br>"towards" | 8.7<br>1<br>8.7<br>9<br>8.7<br>9 | -3.4<br>-2.4<br>-2.4      | -0.8<br>-0.9<br>-0.6 | -<br>10.<br>2<br>-8.5<br>-8.8 | 7.0<br>4.7<br>4.6 | -8.8<br>-7.6<br>-7.8 | 0.2 |

**Table S5.** The full colour-coded interaction mappings of a central reference molecule with nearest neighbors of **2F** and the contributions to the total energy in both spin states as calculated by DTF-B3LYP/6-31G(d,p) method. For the HS state phase calculation are for the fluorine atom oriented in the same way as in the LS state (toward the Fe<sup>II</sup> ion).

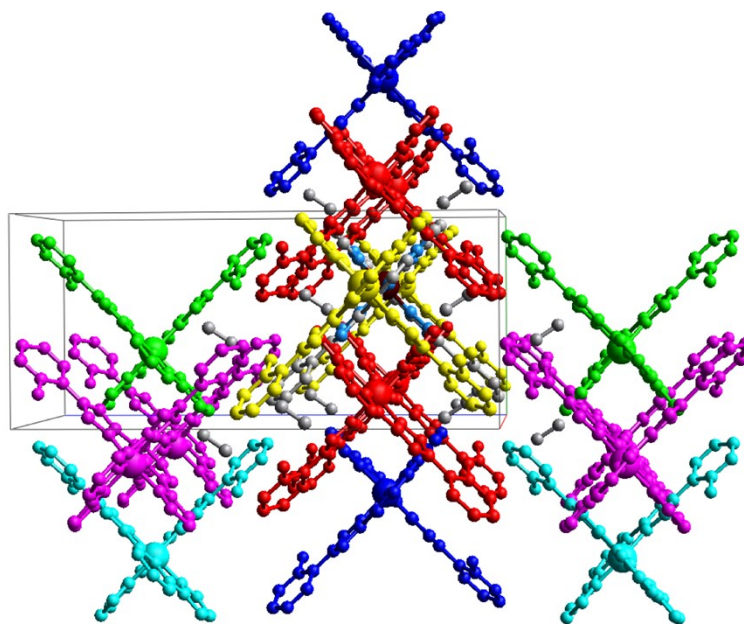

| Col<br>or<br>cod<br>e | Spi<br>n<br>stat<br>e | Symmetry<br>operation         | R, Å | $\Delta R(\text{LS}-\text{HS}),$<br>Å | Energy, kJ mol <sup>-1</sup> |                  |            |                            |          | $\Delta E(\text{Total})$<br>(LS-<br>HS) |
|-----------------------|-----------------------|-------------------------------|------|---------------------------------------|------------------------------|------------------|------------|----------------------------|----------|-----------------------------------------|
|                       |                       |                               |      |                                       | Electrostat<br>ic            | Polarizatio<br>n | Dispersion | Exchange<br>-<br>repulsion | E(Total) |                                         |
| Red                   | LS<br>HS              | $x+1/2, y+1/2,$<br>$-z+1/2^*$ | 8.33 | <b>-0.01</b>                          | -38.4                        | -17.6            | -74.0      | 58.8                       | -81.7    | <b>3.1</b>                              |
|                       |                       |                               | 8.34 |                                       | -34.7                        | -18.0            | -80.1      | 56.6                       | -84.8    |                                         |
| Green                 | LS<br>HS              | $-x, -y, -z$                  | 12.2 | <b>-0.33</b>                          | -0.4                         | -2.8             | -21.3      | 9.5                        | -15.1    | <b>1.2</b>                              |
|                       |                       |                               | 12.5 |                                       | -2.1                         | -2.5             | -19.4      | 7.6                        | -16.3    |                                         |
| Yellow                | LS<br>HS              | $x, y, z$                     | 12.7 | <b>-0.27</b>                          | 7.4                          | -1.5             | -8.8       | 4.8                        | 2.1      | <b>0.5</b>                              |
|                       |                       |                               | 13.0 |                                       | 7.1                          | -1.9             | -10.6      | 7.6                        | 1.6      |                                         |
| Magenta               | LS<br>HS              | $-x+1/2, -$<br>$y+1/2, z+1/2$ | 15.1 | <b>-0.13</b>                          | 0.5                          | -0.7             | -4.1       | 0.1                        | -3.5     | <b>-0.7</b>                             |
|                       |                       |                               | 15.2 |                                       | 0.6                          | -0.7             | -3.5       | 0.0                        | -2.8     |                                         |
| Cyan                  | LS<br>HS              | $-x, -y, -z$                  | 16.8 | <b>0.19</b>                           | -1.4                         | -0.7             | -10.5      | 7.3                        | -6.6     | <b>-1.0</b>                             |
|                       |                       |                               | 16.6 |                                       | -0.1                         | -0.6             | -7.9       | 3.0                        | -5.6     |                                         |
|                       |                       |                               | 16.3 |                                       |                              |                  |            |                            |          |                                         |

|  |    |          |      |             |       |      |       |      |       |             |
|--|----|----------|------|-------------|-------|------|-------|------|-------|-------------|
|  | LS | x, y, z* | 10.7 | <b>0.30</b> | -25.7 | -5.6 | -32.7 | 24.9 | -44.4 | <b>-4.3</b> |
|  | HS |          | 0    |             | -22.5 | -5.2 | -29.1 | 20.7 | -40.1 |             |
|  |    |          | 10.4 |             |       |      |       |      |       |             |
|  |    |          | 0    |             |       |      |       |      |       |             |

\* interactions within the supramolecular layers of stacking molecules

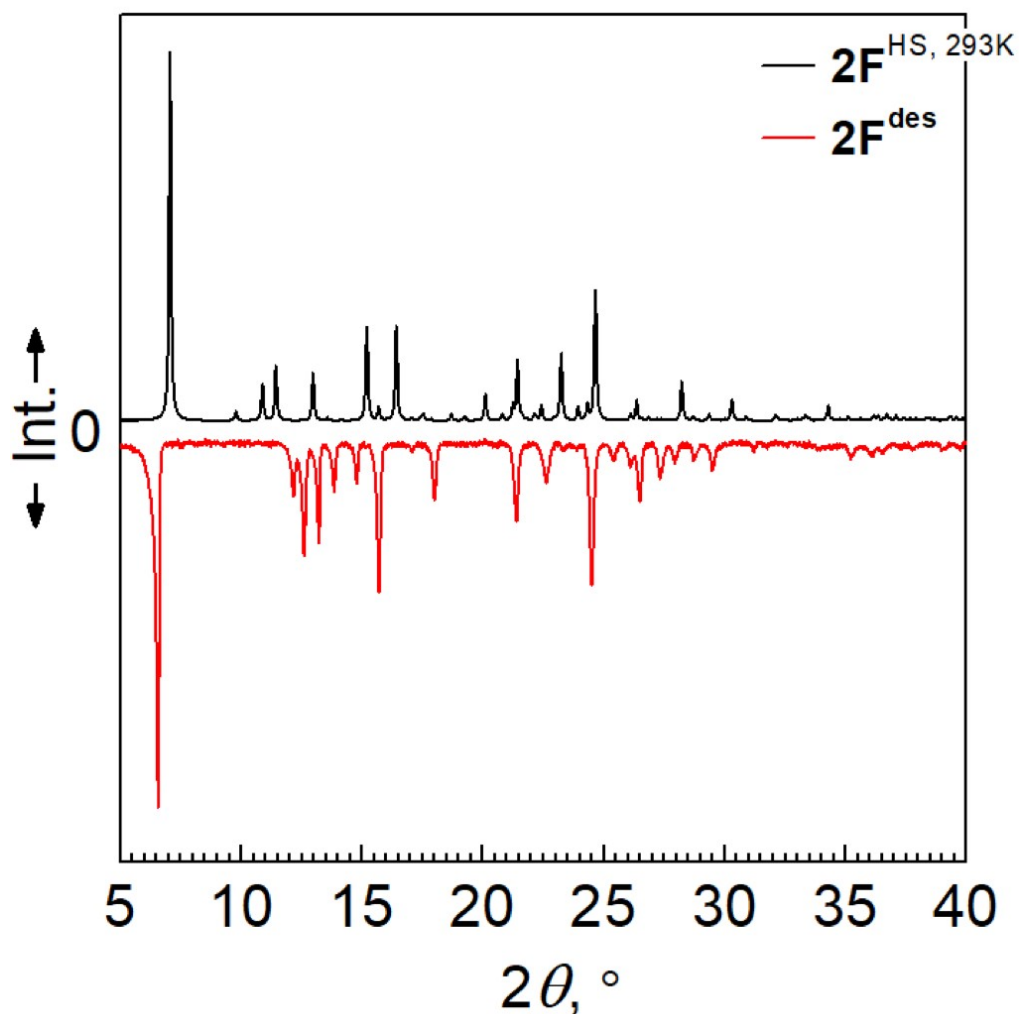

**Figure S1.** Comparison of calculated X-ray powder diffraction profile of **2F** at 293 K with the experimental one of **2F<sup>des</sup>** recorded at room temperature.

## REFERENCES

- 1 A. Altomare, C. Cuocci, C. Giacovazzo, A. Moliterni, R. Rizzi, N. Corriero, A. Falcicchio, *J. Appl. Crystallogr.* **2013**, *46*, 1231-1235.
